# Supplementary material for: Clinicopathological Implications of Mitochondrial Genome Alterations in Pediatric Acute Myeloid Leukemia
Source: PubMed Central journal article supplement — Ann Lab Med. 2015 Dec 18;36(2):101–10. doi: 10.3343/alm.2016.36.2.101 (PMC4713842; doi:10.3343/alm.2016.36.2.101), 2015-12-18
Supplement: alm-36-101-s001.pdf [file alm-36-101-s001.pdf]

**Supplemental Data Table S1.** Characteristics in pediatric AML patients and individually matched controls

|                 | AML patients (N= 55) | Control subjects (N= 55) | <i>P</i> |
|-----------------|----------------------|--------------------------|----------|
| Gender          |                      |                          | 0.8485   |
| Female          | 28 (50.9%)           | 30 (54.5%)               |          |
| Male            | 27 (49.1%)           | 25 (45.5%)               |          |
| Age range (yr)* | 9.4 ± 4.8 (1-17)     | 10.3 ± 1.8 (7-13)        | 0.06     |

\*mean ± SD (range).
