# Supplementary material for: Clinicopathological Implications of Mitochondrial Genome Alterations in Pediatric Acute Myeloid Leukemia
Source: PubMed Central journal article supplement — Ann Lab Med. 2015 Dec 18;36(2):101–10. doi: 10.3343/alm.2016.36.2.101 (PMC4713842; doi:10.3343/alm.2016.36.2.101), 2015-12-18
Supplement: alm-36-101-s002.pdf [file alm-36-101-s002.pdf]

**Supplemental Data Table S2.** Clinical and laboratory characteristics in pediatric AML cases and individually matched controls

| Characteristics              | AML patients (N= 55) | Control subjects (N= 55) | <i>P</i> |
|------------------------------|----------------------|--------------------------|----------|
| Risk group classification    |                      |                          |          |
| Low-risk                     | 23 (41.8%)           | N/A                      |          |
| Intermediate-risk            | 26 (47.2%)           | N/A                      |          |
| High-risk                    | 6 (11%)              | N/A                      |          |
| Overall survival (month)*    | 37.8 ± 36.7 (0-198)  | N/A                      |          |
| Event free survival (month)* | 35.4 ± 34 (0-154)    | N/A                      |          |
| mtDNA copy number            | 3,971 ± 3,511        | 1,767 ± 807              | 0.000074 |
| 4,977-bp large deletion      | 0.0003 ± 0.00005     | 0.000007 ± 0.000011      | 0.0074   |

\*mean ± SD (range).
