# Supplementary material for: Clinicopathological Implications of Mitochondrial Genome Alterations in Pediatric Acute Myeloid Leukemia
Source: PubMed Central journal article supplement — Ann Lab Med. 2015 Dec 18;36(2):101–10. doi: 10.3343/alm.2016.36.2.101 (PMC4713842; doi:10.3343/alm.2016.36.2.101), 2015-12-18
Supplement: alm-36-101-s003.pdf [file alm-36-101-s003.pdf]

**Supplemental Data Table S3.** Primer sets for PCR, direct sequencing, gene scan, mtDNA copy number

|                                                         | Starting nucleotide | Sequence                      |
|---------------------------------------------------------|---------------------|-------------------------------|
| Primers for PCR and sequencing                          |                     |                               |
| Control region (1.12 kb)<br>(np 16,024-16,569:np 1-576) | F15971              | 5'-TTAACTCCACCATTAGCACC-3'    |
|                                                         | R611                | 5'-CAGTGTATTGCTTTGAGGAG-3'    |
|                                                         | F15971              | 5'-TTAACTCCACCATTAGCACC-3'    |
|                                                         | R48                 | 5'-GCATGGAGAGCTCCCGTGAGTGG-3' |
|                                                         | F15                 | 5'-CACCCCTATTAACCACTCACG-3'   |
|                                                         | R611                | 5'-CAGTGTATTGCTTTGAGGAG-3'    |
| <i>tRNA<sup>leu</sup></i> (np 2,972-3,557:586 bp)       | F2972               | 5'-ATAGGGTTTACGACCTCGATG-3'   |
|                                                         | R3557               | 5'-AGAAGAGCGATGGTGAGAGC-3'    |
| <i>CYTb</i> (np 14,909-15,396:488 bp)                   | F14909              | 5'-TACTCAC CAGACGCCCAACCG-3'  |
|                                                         | R15396              | 5'-TTATCGGAATGGGAGGTGATTC-3'  |
| Primers for gene scan                                   |                     |                               |
| np 303-315 in HV2 (122 bp)                              | F264                | 5'-CCACACAGACATCATAAC-3'      |
|                                                         | R391                | 5'-CTGGTTAGGCTGGTGTAG-3'      |
| np 16,184-16,193 in HV1 (110 bp)                        | F16142              | 5'-CTTGACCACCTGTAGTAC-3'      |
|                                                         | R16251              | 5'-GGAGTTGCAGTTGATGTG-3'      |
| 514 (CA) repeat (90bp)                                  | F467                | 5'-CCATACTACTAATCTCATCAA-3'   |
|                                                         | R556                | 5'-TTGGTTGGTTCGGGGTATG-3'     |
| Primers for mtDNA copy number                           |                     |                               |
| <i>CYTb</i> (488 bp)                                    | F14909              | 5'-TACTCACAGACGCCCTCAACCG-3'  |
|                                                         | R15396              | 5'-TTATCGGAATGGGAGGTGATTC-3'  |
| <i>β-actin</i> (250bp)                                  | F 2259              | 5'-TCATCACCATTGGCAATGAG-3'    |
|                                                         | R 2508              | 5'-CACTGTGTGGCGTACAGGT-3'     |
