# Supplementary material for: Clinicopathological Implications of Mitochondrial Genome Alterations in Pediatric Acute Myeloid Leukemia
Source: PubMed Central journal article supplement — Ann Lab Med. 2015 Dec 18;36(2):101–10. doi: 10.3343/alm.2016.36.2.101 (PMC4713842; doi:10.3343/alm.2016.36.2.101), 2015-12-18
Supplement: alm-36-101-s004.pdf [file alm-36-101-s004.pdf]

**Supplemental Data Table S4.** The mtDNA sequence alterations (polymorphism) found in pediatric AML patients and controls\*

| Group                               | Varinats found in each group |         |                  |                |              |         |         |                  |          |           |
|-------------------------------------|------------------------------|---------|------------------|----------------|--------------|---------|---------|------------------|----------|-----------|
| Controls                            | T63C                         | C64T    | T65G             | G68A           | A73C         | G75A    | T89C    | G143A            | G228A    | T245C     |
|                                     | A257G                        | T294C   | C309T            | T321G          | T334C        | C431T   | T3308C  | <b>3167C3168</b> | C3169T   | G3316A    |
|                                     | T3394C                       | G3496T  | <b>3504T3505</b> | A15038G        | C15040T      | T15071C | A15218G | C15292T          | A16051G  | G16145A   |
|                                     | A16162G                      | C16168T | A16183C          | C16188T        | C16192T      | C16193T | A16194G | T16195C          | G16213A  | A16227G   |
|                                     | C16228G                      | A16240G | C16264T          | A16265C        | C16268T      | A16280G | T16288C | G16303A          | A16316G  | T16357C   |
|                                     | C16380T                      |         |                  |                |              |         |         |                  |          |           |
| Pediatric AML patients              | A93G                         | T131C   | <b>T148T</b>     | C151T          | <b>T152A</b> | T152DEL | C182T   | A197G            | A210G    | A211G     |
|                                     | C280T                        | A291DEL | C324G            | A374G          | T455TT       | C481T   | T489C   | G499A            | A508G    | A546G     |
|                                     | A3203G                       | A3221G  | <b>G3407C/G</b>  | <b>A15163G</b> | A15235G      | A15244G | G15261A | T15289C          | T16075C  | T16086C   |
|                                     | T16092C                      | C16111T | T16136C          | T16154C        | A16164G      | C16176T | C16185T | C16187T          | C16188CC | T16189DEL |
|                                     | C16193CC                     | C16197T | A16207G          | A16216G        | C16218T      | C16232A | C16234T | C16234T/A        | C16250T  | A16254G   |
|                                     | A16258G                      | C16260A | C16266A          | A16272G        | C16287T/C    | A16293G | C16344T | G16390A/G        | C16400T  | G16428A   |
| Controls and pediatric AML patients | A73G                         | G94A    | G103A            | T146C          | C150T        | T152C   | C194T   | T195C            | T199C    | A200G     |
|                                     | T204C                        | G207A   | A214G            | T217C          | A235G        | A249DEL | G260A   | A263G            | T408A    | C456T     |
|                                     | G513DEL                      | C514DEL | A523DEL          | C525DEL        | N3107DEL     | C3206T  | T3290C  | C3497T           | A3537G   | T14979C   |
|                                     | G15043A                      | T15067C | G15077A/G        | C15223T        | G15301A      | G15323A | A15326G | G15346A          | T16093C  | T16126C   |
|                                     | G16129A                      | T16140C | C16150T          | T16172C        | A16182C      | C16184T | T16189C | A16194C          | T16209C  | T16217C   |
|                                     | C16223T                      | T16231C | T16243C          | T16249C        | C16257A      | C16261T | C16266T | C16278T          | C16287T  | C16290T   |
|                                     | C16295T                      | T16297C | T16298C          | T16304C        | T16311C      | G16319A | T16324C | T16325C          | C16355T  | C16360T   |
|                                     | T16362C                      | G16390A | A16399G          | A16463G        | A16497G      | T16519C | A16235G | G16274A          |          |           |

\*Newly identified mtDNA mutations are highlighted in bold.
