# Supplementary material for: Clinicopathological Implications of Mitochondrial Genome Alterations in Pediatric Acute Myeloid Leukemia
Source: PubMed Central journal article supplement — Ann Lab Med. 2015 Dec 18;36(2):101–10. doi: 10.3343/alm.2016.36.2.101 (PMC4713842; doi:10.3343/alm.2016.36.2.101), 2015-12-18
Supplement: alm-36-101-s005.pdf [file alm-36-101-s005.pdf]

**Supplemental Data Table S5.** Distribution of mtDNA minisatellite instability in the HV1 and HV2 regions of pediatric AML patients and controls

| Location of Poly C tract                      | Reference sequence          | Patterns in pediatric AML                      | N         | %          | Patterns in control                     | N         | %          | Comment                   |
|-----------------------------------------------|-----------------------------|------------------------------------------------|-----------|------------|-----------------------------------------|-----------|------------|---------------------------|
| 303 poly C<br>(nt303-315 in HV2)              | CCCCCCTCCCCC<br>(7CT6C)     | 7CT6C, 8CT6C                                   | 15        | 27.3       | 6CT6C, 7CT6C                            | 1         | 1.8        | Association<br>of T310C   |
|                                               |                             | 7CT6C, 8CT6C, 9CT6C                            | 1         | 1.8        | 7CT6C, 8CT6C                            | 15        | 27.3       |                           |
|                                               |                             | 7CT6C, 8CT6C, 9CT6C, 10CT6C                    | 3         | 5.5        | 7CT6C, 8CT6C, 9CT6C, 10CT6C             | 7         | 12.7       |                           |
|                                               |                             | 7CT6C, 8CT6C, 9CT6C, 10CT6C,<br>11CT6C         | 1         | 1.8        | 8CT6C, 9CT6C                            | 6         | 10.9       |                           |
|                                               |                             | 7CT6C, 8CT6C, 9CT6C, 10CT6C,<br>11CT6C, 12CT6C | 1         | 1.8        | 8CT6C, 9CT6C, 10CT6C                    | 10        | 18.2       |                           |
|                                               |                             | 8CT6C, 9CT6C                                   | 5         | 9.1        | 8CT6C, 9CT6C, 10CT6C, 11CT6C            | 10        | 18.2       |                           |
|                                               |                             | 8CT6C, 9CT6C, 10CT6C                           | 10        | 18.2       | 8CT6C, 9CT6C, 10CT6C, 11CT6C,<br>12CT6C | 1         | 1.8        |                           |
|                                               |                             | 8CT6C, 9CT6C, 10CT6C, 11CT6C                   | 7         | 12.7       | 10C, 11C, 12C, 13C, 14C, 15C            | 1         | 1.8        |                           |
|                                               |                             | 8CT6C, 9CT6C, 10CT6C, 11CT6C,<br>12CT6C        | 4         | 7.3        | 14C, 15C, 16C, 17C, 18C                 | 1         | 1.8        |                           |
|                                               |                             | 9CT6C, 10CT6C, 11CT6C 12CT6C                   | 1         | 1.8        | 15C, 16C, 17C, 18C, 19C                 | 1         | 1.8        |                           |
|                                               |                             | 12C, 13C, 15C, 16C, 17C, 18C                   | 1         | 1.8        | 15C, 16C, 17C, 18C, 19C, 20C            | 2         | 3.6        |                           |
|                                               |                             | 14C, 15C, 16C, 17C                             | 1         | 1.8        |                                         |           |            |                           |
|                                               |                             | 14C, 15C, 16C, 17C, 18C, 19C                   | 1         | 1.8        |                                         |           |            |                           |
|                                               |                             | 15C, 16C, 17C, 18C                             | 3         | 5.5        |                                         |           |            |                           |
|                                               |                             | 15C, 16C, 17C, 18C, 19C                        | 1         | 1.8        |                                         |           |            |                           |
| <b>Total</b>                                  |                             |                                                | <b>55</b> | <b>100</b> |                                         | <b>55</b> | <b>100</b> |                           |
| 16,189 poly C<br>(nt16,184-16,<br>193 in HV1) | CCCCCTCCCC<br>(5CT4C)       | 4CT4C, 5CT4C                                   | 5         | 9.1        | 4CT4C, 5CT4C                            | 15        | 27.3       | Association<br>of T16189C |
|                                               |                             | 4CT4C, 5CT4C, 6CT4C, 7CT4C,<br>8CT4C, 9CT4C    | 2         | 3.6        | 5CT4C                                   | 12        | 21.8       |                           |
|                                               |                             | 4CT4C, 5CT4C, 6CT4C, 7CT4C                     | 1         | 1.8        | 5CT4C, 6CT4C, 7CT4C, 8CT4C              | 2         | 3.6        |                           |
|                                               |                             | 5CT4C                                          | 25        | 45.5       | 5CT4C, 6CT4C, 7CT4C, 8CT4C,<br>9CT4C    | 2         | 3.6        |                           |
|                                               |                             | 5CT4C, 6CT4C, 7CT4C, 8CT4C                     | 1         | 1.8        | 8CT4C                                   | 2         | 3.6        |                           |
|                                               |                             | 6CT4C                                          | 2         | 3.6        | 8C, 9C, 10C, 11C, 12C, 13C              | 1         | 1.8        |                           |
|                                               |                             | 4C, 5C, 6C, 7C, 8C                             | 1         | 1.8        | 9C, 10C, 11C                            | 1         | 1.8        |                           |
|                                               |                             | 8C, 9C, 10C, 11C                               | 1         | 1.8        | 9C, 10C, 11C, 12C                       | 4         | 7.3        |                           |
|                                               |                             | 8C, 9C, 10C, 11C, 12C, 13C, 14C                | 1         | 1.8        | 9C, 10C, 11C, 12C, 13C                  | 11        | 20         |                           |
|                                               |                             | 8C, 9C, 10C, 11C                               | 1         | 1.8        | 9C, 10C, 11C, 12C, 13C, 14C             | 1         | 1.8        |                           |
|                                               |                             | 8C, 9C, 10C, 11C, 12C                          | 1         | 1.8        | 10C, 11C                                | 1         | 1.8        |                           |
|                                               |                             | 9C, 10C, 11C, 12C, 13C                         | 2         | 3.6        | 10C, 11C, 12C                           | 3         | 5.5        |                           |
|                                               |                             | 9C, 10C, 11C, 12C                              | 3         | 5.5        |                                         |           |            |                           |
|                                               |                             | 9C, 10C, 11C, 12C, 13C                         | 5         | 9.1        |                                         |           |            |                           |
|                                               |                             | 10C, 11C, 12C, 13C                             | 3         | 5.5        |                                         |           |            |                           |
| 10C, 11C, 12C, 13C, 14C                       | 1                           | 1.8                                            |           |            |                                         |           |            |                           |
| <b>Total</b>                                  |                             |                                                | <b>55</b> | <b>100</b> |                                         | <b>55</b> | <b>100</b> |                           |
| 514 CA<br>(nt514-523 in HV2)                  | CACACACACA (CA)<br>5repeats | (CA)4                                          | 19        | 34.5       | (CA)4                                   | 19        | 34.5       |                           |
|                                               |                             | (CA)5                                          | 36        | 65.5       | (CA)5                                   | 36        | 65.5       |                           |
| <b>Total</b>                                  |                             |                                                | <b>55</b> | <b>100</b> |                                         | <b>55</b> | <b>100</b> |                           |
