# Supplementary material for: Clinicopathological Implications of Mitochondrial Genome Alterations in Pediatric Acute Myeloid Leukemia
Source: PubMed Central journal article supplement — Ann Lab Med. 2015 Dec 18;36(2):101–10. doi: 10.3343/alm.2016.36.2.101 (PMC4713842; doi:10.3343/alm.2016.36.2.101), 2015-12-18
Supplement: alm-36-101-s006.pdf [file alm-36-101-s006.pdf]

**Supplemental Data Table S6.** Comparison of the frequencies of mtDNA haplogroups in healthy controls and pediatric AML patients

| Haplogroup | Frequency (N, %)    |      |                     |      |                        |      | <i>P</i> | Haplogroup | Frequency (N, %)    |       |                     |       |                        |       | <i>P</i> |
|------------|---------------------|------|---------------------|------|------------------------|------|----------|------------|---------------------|-------|---------------------|-------|------------------------|-------|----------|
|            | Healthy controls    |      |                     |      | Pediatric AML patients |      |          |            | Healthy controls    |       |                     |       | Pediatric AML patients |       |          |
|            | Korean <sup>†</sup> |      | Korean <sup>‡</sup> |      |                        |      |          |            | Korean <sup>†</sup> |       | Korean <sup>‡</sup> |       |                        |       |          |
| A          | 4                   | 5.7  | 3                   | 5.3  |                        |      | F        | 3          | 4.3                 |       |                     |       |                        |       |          |
| A4         |                     |      |                     |      | 1                      | 1.8  | F1a      | 1          | 1.4                 | 2     | 3.5                 |       |                        |       |          |
| A5         | 2                   | 2.9  |                     |      |                        |      | F1ac     |            |                     |       |                     | 2     | 3.6                    |       |          |
| A5a        |                     |      |                     |      | 2                      | 3.6  | F1b      | 2          | 2.9                 | 1     | 1.8                 |       |                        |       |          |
| A5b        |                     |      |                     |      | 1                      | 1.8  | F1b1     |            |                     |       |                     | 1     | 1.8                    |       |          |
| Subtotal   | 6                   | 8.6  | 3                   | 5.3  | 4                      | 7.3  | 0.964    | F1c        |                     |       | 1                   | 1.8   |                        |       |          |
| B          | 4                   | 5.7  |                     |      |                        |      | F3a      | 1          | 1.4                 |       |                     |       |                        |       |          |
| B4         | 2                   | 2.9  | 3                   | 5.3  | 2                      | 3.6  | 0.923    | F4a        |                     |       |                     | 1     | 1.8                    |       |          |
| B4a        | 4                   | 5.7  |                     |      | 2                      | 3.6  |          | Subtotal   | 7                   | 10.0  | 4                   | 7.0   | 4                      | 7.3   | 0.754    |
| B4b1       |                     |      | 1                   | 1.8  | 1                      | 1.8  |          | G1a        | 4                   | 5.7   |                     |       |                        |       |          |
| B4c1a      |                     |      |                     |      | 2                      | 3.6  |          | G1a1       |                     |       |                     |       | 1                      | 1.8   |          |
| B4c1c      |                     |      |                     |      | 1                      | 1.8  |          | G2a        | 2                   | 2.9   | 2                   | 3.5   | 1                      | 1.8   | 0.614    |
| B4d        |                     |      |                     |      | 1                      | 1.8  |          | G3         | 1                   | 1.4   |                     |       |                        |       |          |
| B5a        | 1                   | 1.4  | 2                   | 3.5  |                        |      |          | G4a        |                     |       | 2                   | 3.5   |                        |       |          |
| B5a2       |                     |      |                     |      | 1                      | 1.8  |          | G4b        |                     |       | 1                   | 1.8   |                        |       |          |
| B5b        | 1                   | 1.4  | 2                   | 3.5  | 2                      | 3.6  | 0.629    | Subtotal   | 7                   | 10.0  | 5                   | 8.8   | 2                      | 3.6   | 0.177    |
| Subtotal   | 12                  | 17.1 | 8                   | 14.0 | 12                     | 21.8 | 0.323    | M          | 1                   | 1.4   |                     |       | 1                      | 1.8   |          |
| D          | 2                   | 2.9  |                     |      |                        |      |          | M7a1       |                     |       | 2                   | 3.5   | 2                      | 3.6   |          |
| D4*        | 11                  | 15.7 | 16                  | 28.1 | 3                      | 5.5  | 0.008    | M7b2       | 1                   | 1.4   | 3                   | 5.3   | 2                      | 3.6   | 0.866    |
| D4a        | 2                   | 2.9  |                     |      | 3                      | 5.5  |          | M7c1       | 1                   | 1.4   | 3                   | 5.3   | 1                      | 1.8   | 0.614    |
| D4b1       | 1                   | 1.4  |                     |      |                        |      |          | M8a        |                     |       | 3                   | 5.3   | 1                      | 1.8   |          |
| D4b2b      |                     |      |                     |      | 1                      | 1.8  |          | M8a2       |                     |       |                     |       | 1                      | 1.8   |          |
| D4e1       |                     |      |                     |      | 1                      | 1.8  |          | M9a        |                     |       | 1                   | 1.8   |                        |       |          |
| D4g1       |                     |      |                     |      | 1                      | 1.8  |          | M10        | 4                   | 5.7   | 5                   | 8.8   |                        |       |          |
| D4j1       |                     |      |                     |      | 1                      | 1.8  |          | Subtotal   | 7                   | 10.0  | 17                  | 29.8  | 8                      | 14.5  | 0.479    |
| D4n        |                     |      |                     |      | 1                      | 1.8  |          | N9a        | 3                   | 4.3   | 1                   | 1.8   |                        |       |          |
| D5         | 4                   | 5.7  | 2                   | 3.5  | 2                      | 3.6  | 0.742    | N9a1       | 1                   | 1.4   |                     |       | 3                      | 5.5   |          |
| D5a        | 2                   | 2.9  |                     |      |                        |      |          | N9a2       | 3                   | 4.3   |                     |       |                        |       |          |
| D5a2       |                     |      |                     |      | 1                      | 1.8  |          | Subtotal   | 7                   | 10.0  | 1                   | 1.8   | 3                      | 5.5   | 0.826    |
| D5b        | 1                   | 1.4  |                     |      | 2                      | 3.6  |          | Y          |                     |       | 1                   | 1.8   |                        |       |          |
| D5c        |                     |      |                     |      | 2                      | 3.6  |          | Y1         | 1                   | 1.4   |                     |       |                        |       |          |
| Subtotal   | 23                  | 32.9 | 18                  | 31.6 | 18                     | 32.7 | 0.953    | Y1b        |                     |       |                     |       | 3                      | 5.5   |          |
|            |                     |      |                     |      |                        |      |          | Subtotal   | 1                   | 1.4   | 1                   | 1.8   | 3                      | 5.5   | 0.141    |
|            |                     |      |                     |      |                        |      |          | Z          |                     |       |                     |       | 1                      | 1.8   |          |
|            |                     |      |                     |      |                        |      |          | Subtotal   |                     |       |                     |       | 1                      | 1.8   |          |
|            |                     |      |                     |      |                        |      |          | Total      | 70                  | 100.0 | 57                  | 100.0 | 55                     | 100.0 |          |

\*Odds ratio for risk of pediatric AML development=0.213675 (95% CI; 0.061898-0.73762).  
Healthy controls of reference 22<sup>†</sup> and reference 23<sup>‡</sup>.
