# Supplementary material for: Clinicopathological Implications of Mitochondrial Genome Alterations in Pediatric Acute Myeloid Leukemia
Source: PubMed Central journal article supplement — Ann Lab Med. 2015 Dec 18;36(2):101–10. doi: 10.3343/alm.2016.36.2.101 (PMC4713842; doi:10.3343/alm.2016.36.2.101), 2015-12-18
Supplement: alm-36-101-s007.pdf [file alm-36-101-s007.pdf]

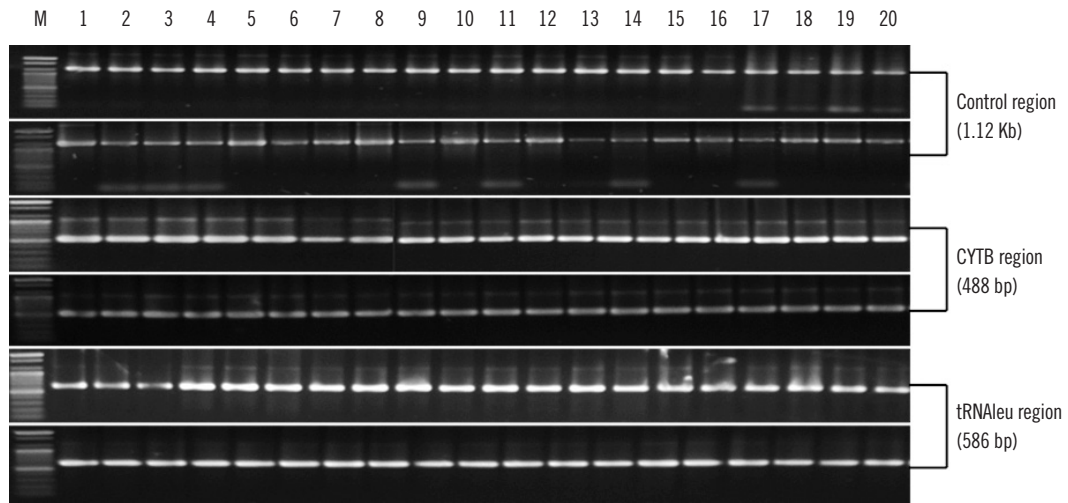

**Supplemental Data Fig. S1.** Amplified PCR products of the mtDNA genes for direct sequencing. Agarose gel image after electrophoresis showed a clear amplification of the mtDNA control region, the *CYTB* gene, and the *tRNA leucine 1* gene, respectively.
